# Supplementary material for: Structural evolution of carbon in an Fe@C catalyst during the Fischer–Tropsch synthesis reaction
Source: Royal Society of Chemistry journal article supplement (doi:10.1039/c8cy02420k), 2019-01-01
Supplement: c8cy02420k1.pdf [file c8cy02420k1.pdf]

## Supporting Information

### **Structural evolution of carbon in Fe@C catalyst during Fischer-Tropsch synthesis reaction**

Shuai Lyu,<sup>a, b</sup> Chengchao Liu,<sup>b</sup> Guanghui Wang,<sup>a\*</sup> Yuhua Zhang,<sup>b</sup> Jinlin Li,<sup>b</sup> Li Wang,<sup>b\*</sup>

a. Hubei Key Laboratory of Coal Conversion and New Carbon Material, School of Chemical Engineering and Technology, Wuhan University of Science and Technology, Wuhan 430081, China.

b. Key Laboratory of Catalysis and Materials Science of the State Ethnic Affairs Commission & Ministry of Education, South-Central University for Nationalities, Wuhan 430074, China.

**E-mail: [li.wang@mail.scuec.edu.cn](mailto:li.wang@mail.scuec.edu.cn) (L. Wang); [wghwang@263.net](mailto:wghwang@263.net) (G. Wang),**

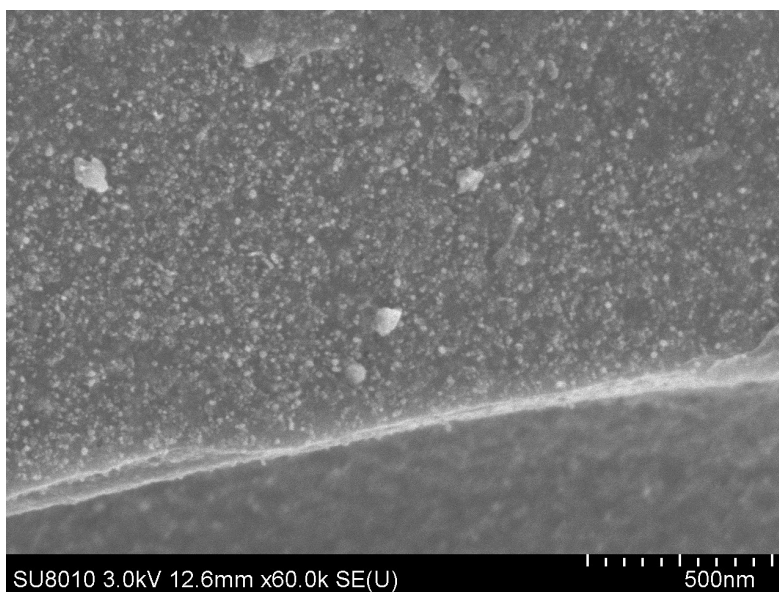

Figure S1. SEM images of Fe@C-F sample.

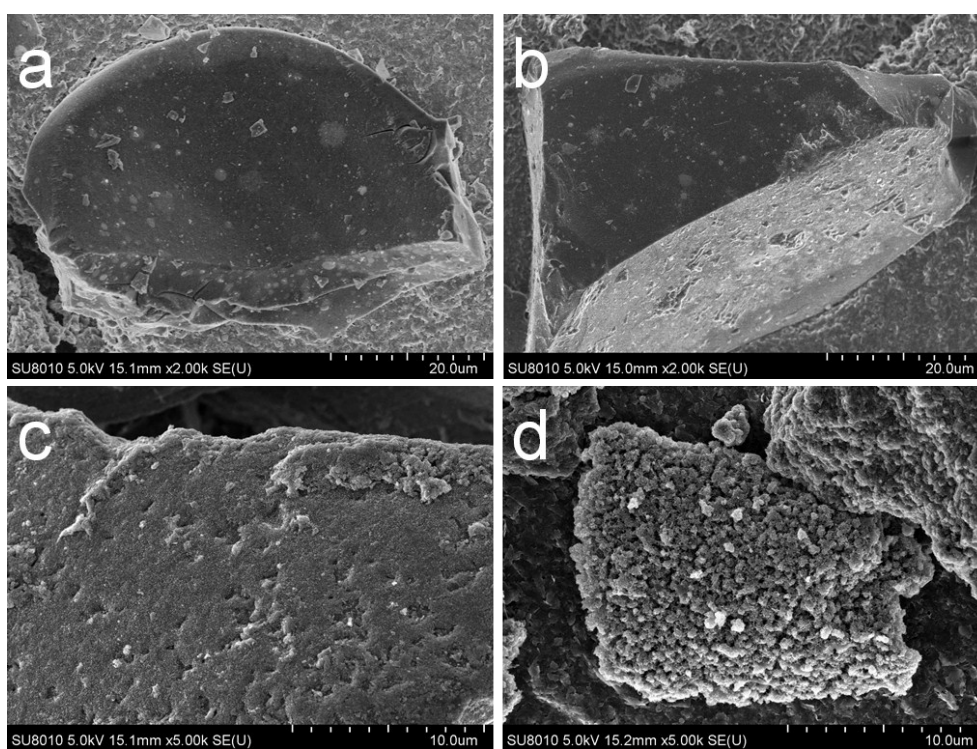

Figure S2. SEM images of the as-synthesized catalysts. a: Fe@C-F; b: Fe@C-U-300; c: Fe@C-U-320; d: Fe@C-U-340.

Table S1. Detailed parameters of the DTG profiles over the as-synthesized catalysts. <sup>a</sup>

| Catalysts  | Weight loss (%) | Peak position (°C) |                     |               |           |
|------------|-----------------|--------------------|---------------------|---------------|-----------|
|            |                 | atomic carbon      | functional groups & | non-graphitic | graphitic |
| Fe@C-F     | 42.1            | --                 | 337                 | 390           | 505       |
| Fe@C-U-300 | 41.9            | --                 | 353                 | 398           | 535       |
| Fe@C-U-320 | 38.9            | --                 | 356                 | 398           | 522       |
| Fe@C-U-340 | 17.4            | --                 | 353                 | 394           | 486, 557  |

a: The content of Fe calculate from weight loss, Fe<sub>2</sub>O<sub>3</sub> was regarded as final phase after a TGA test in air.
